# Supplementary material
Source: PubMed Central journal article supplement (PMC5387409)
Supplement: NIHMS854434-supplement-supplement_1.pdf [file NIHMS854434-supplement-supplement_1.pdf]

## **Supplemental Material**

### **Plasma concentrations of perfluorooctane sulfonamide (PFOSA) and time to pregnancy among primiparous women**

Kristina W. Whitworth, Line S. Haug, Azemira Sabaredzovic, Merete Eggesbo, Matthew P. Longnecker

### Multiple Imputation procedure:

The MI procedure was conducted using IVEware v0.2 (University of Michigan, <http://www.isr.umich.edu/src/smp/ive/>). In each model, estimated PFOSA values were forced to be <LOQ and 10 iterations were run. The following were included as predictors in MI model #1: maternal age, BMI, education, annual income, pre-pregnancy smoking, shellfish, lean fish, and oily fish consumption, menstrual cycle regularity, oral contraceptive use in the previous 12 months, and serum albumin concentration (g/dL). We chose these variables based on their correlation with plasma PFAS concentrations in this population.<sup>1</sup> MI model #2 included the model #1 variables plus plasma concentrations of nine other PFASs (PFDA, PFDoDA, PFHpS, PFHxS, PFNA, PFOA, PFOS, PFTrDA, and PFUnDA). MI model #3 included the model #1 variables plus PFNA, which had the strongest correlation with PFOSA concentrations ( $r=0.27$ ,  $p<0.001$ ). For each MI model, we calculated age and BMI-adjusted FORs and 95% CIs for the association between each of the 10 iterations of the multiply-imputed PFOSA variable (divided by the IQD of the original variable). These 10 estimates were combined using PROC MI in SAS, resulting in one estimate of the association between PFOSA and TTP for each MI model.

eTable 1. Comparison of analyses of PFAS and time-to-pregnancy from the Norwegian Mother and Child Cohort Study (MoBa).

| Study                         | Analysis          | Sample Size | Treatment of Parity             | PFASs Analyzed                                                          | Main Results                                                                |
|-------------------------------|-------------------|-------------|---------------------------------|-------------------------------------------------------------------------|-----------------------------------------------------------------------------|
| Whitworth et al. <sup>2</sup> | Logistic          | 910 women   | Stratified by parity            | PFOS and PFOA                                                           | Increased odds of subfecundity among parous women but not primiparous women |
|                               | Outcome           |             |                                 |                                                                         |                                                                             |
| Ding et al. <sup>3</sup>      | Dependent         | 910 women   | None                            | PFOS and PFOA                                                           | Decreased fecundability associated with PFOA concentrations among all women |
|                               | Sampling Design   |             |                                 |                                                                         |                                                                             |
| Present Study                 | Discrete-Time     | 451 women   | Restricted to primiparous women | PFDA, PFDoDA, PFHpS, PFHxS, PFNA, PFOA, PFOS, PFOSA, PFTrDA, and PFUnDA | Limited evidence of decreased fecundability associated PFAS                 |
|                               | Survival Analysis |             |                                 |                                                                         |                                                                             |

eTable 1 summarizes relevant issues and results across the three analyses of PFAS and fecundity or fecundability that have been conducted in MoBa. It is important to note that the analysis by Ding et al.<sup>3</sup> used the PFAS data from the MoBa study, including data on parous women, in an example analysis to demonstrate an innovative statistical method. Their analysis showed improved efficiency of the estimator, but the results were not intended to have subject matter relevance. For results relevant to the subject matter, refer to Whitworth et al.<sup>2</sup> and results from the present analysis.

eTable 3. Demographics of 451 nulliparous women from a case-base study among the Norwegian Mother and Child Cohort (MoBa) Study, 2003-2004

|                                      | n   | %  |
|--------------------------------------|-----|----|
| <b>Age at Pregnancy Attempt</b>      |     |    |
| <25 years                            | 129 | 29 |
| 25-29 years                          | 211 | 47 |
| 30-34 years                          | 91  | 20 |
| ≥35 years                            | 20  | 4  |
| <b>Prepregnancy BMI</b>              |     |    |
| <18.50                               | 14  | 3  |
| 18.50-24.99                          | 274 | 61 |
| 25.00-29.99                          | 107 | 24 |
| ≥30.00                               | 56  | 12 |
| <b>Prepregnancy Smoking</b>          |     |    |
| Daily                                | 90  | 20 |
| Sometimes                            | 53  | 12 |
| None                                 | 308 | 68 |
| <b>Maternal Education</b>            |     |    |
| < High School                        | 26  | 6  |
| High School                          | 135 | 30 |
| Some College                         | 200 | 44 |
| 4+ Years of College                  | 89  | 20 |
| Missing                              | 1   | 0  |
| <b>Annual Maternal Income (NOK)*</b> |     |    |
| <150,000                             | 46  | 10 |
| 150,000 - 299,999                    | 225 | 50 |
| >300,000                             | 168 | 37 |
| Missing                              | 12  | 3  |
| *1 NOK is approximately 0.12 USD     |     |    |

eTable 2. Crude and adjusted fecundability odds ratios (FOR<sup>a</sup>) for the association between perfluoroalkyl substances (ng/ml) and time to pregnancy among 924 women<sup>b</sup> from a case-base study among the Norwegian Mother and Child Cohort (MoBa) Study, 2003-2004

|                                    | n (%)<br>>LOQ <sup>c</sup> | n <sup>d</sup> | Median A (IQR) <sup>e</sup> | Median B (IQR) <sup>f</sup> | Crude |             |             | Adjusted <sup>g</sup> |             |             |
|------------------------------------|----------------------------|----------------|-----------------------------|-----------------------------|-------|-------------|-------------|-----------------------|-------------|-------------|
|                                    |                            |                |                             |                             | FOR   | Lower Limit | Upper Limit | FOR                   | Lower Limit | Upper Limit |
| <b>Perfluorinated Sulfonamide</b>  |                            |                |                             |                             |       |             |             |                       |             |             |
| PFOSA                              | 353 (38.2)                 | 482            | 0.04 (0.03, 0.04)           | 0.03 (0.01, 0.06)           | 0.98  | 0.86        | 1.13        | 0.85                  | 0.83        | 1.09        |
| <b>Perfluorinated Carboxylates</b> |                            |                |                             |                             |       |             |             |                       |             |             |
| PFBA                               | 2 (0.0)                    | --             | --                          | --                          | ---   | ---         | ---         | ---                   | ---         | ---         |
| PFHpA                              | 108 (11.7)                 | --             | --                          | --                          |       |             |             |                       |             |             |
| PFOA                               | 924 (100.0)                | 924            | 2.25 (1.66, 3.04)           | 2.25 (1.66, 3.04)           | 0.79  | 0.69        | 0.89        | 0.80                  | 0.70        | 0.90        |
| PFNA                               | 924 (100.0)                | 924            | 0.39 (0.29, 0.52)           | 0.39 (0.29, 0.52)           | 0.94  | 0.85        | 1.04        | 0.91                  | 0.82        | 1.01        |
| PFDA                               | 642 (69.5)                 | 866            | 0.09 (0.04, 0.15)           | 0.10 (0.05, 0.15)           | 0.96  | 0.87        | 1.05        | 0.92                  | 0.83        | 1.02        |
| PFUnDA                             | 868 (93.9)                 | 918            | 0.22 (0.13, 0.33)           | 0.22 (0.13, 0.33)           | 0.95  | 0.85        | 1.06        | 0.87                  | 0.77        | 0.97        |
| PFDoDA                             | 203 (22.0)                 | 840            | 0.04 (0.03, 0.05)           | 0.04 (0.02, 0.05)           | 0.93  | 0.83        | 1.04        | 0.87                  | 0.76        | 0.99        |
| PFTTrDA                            | 216 (23.4)                 | 718            | 0.04 (0.03, 0.05)           | 0.04 (0.02, 0.06)           | 1.00  | 0.90        | 1.13        | 0.96                  | 0.85        | 1.08        |
| PFTeDA                             | 6 (0.01)                   | --             | --                          | --                          |       |             |             |                       |             |             |
| <b>Perfluorinated Sulfonates</b>   |                            |                |                             |                             |       |             |             |                       |             |             |
| PFHxS                              | 922 (99.8)                 | 923            | 0.60 (0.44, 0.86)           | 0.60 (0.44, 0.87)           | 0.94  | 0.88        | 1.01        | 0.94                  | 0.88        | 1.01        |
| PFHpS                              | 811 (87.8)                 | 911            | 0.13 (0.09, 0.19)           | 0.13 (0.09, 0.19)           | 0.85  | 0.76        | 0.95        | 0.86                  | 0.77        | 0.96        |
| PFOS                               | 924 (100.0)                | 924            | 13.04 (10.30, 16.58)        | 13.04 (10.30, 16.58)        | 0.88  | 0.79        | 0.98        | 0.87                  | 0.78        | 0.97        |

PFOSA: perfluorooctane sulfonamide; PFBA: perfluorobutanoic acid; PFHpA: Perfluoroheptanoic acid; PFOA: perfluorooctanoic acid; PFNA: perfluorononanoic acid; PFDA: perfluorodecanoic acid; PFUNDA: perfluoroundecanoic acid; PFDoDA: perfluordodecanoic acid; PFTTrDA: perfluorotridecanoic acid; PFTeDA: perfluorotridecanoic acid; PFHxS: perfluorohexane sulfonate; PFHpS: perfluoroheptane sulfonate; PFOS: perfluorooctane sulfonate.

<sup>a</sup>FORs represent the odds of conception in a given month per interquartile increase in PFAS (ng/ml) concentration, based on the interquartile distance corresponding to Median B.

<sup>b</sup>Although these analyses include all women (primiparous and parous), we believe the results that include parous women are biased, and the reasoning is explained in the second paragraph of the Methods section of the paper and in eFigure 1.

<sup>c</sup>The LOQ for PFBA was 0.1 ng/ml; the LOQ for all other compounds was 0.05 ng/ml.

<sup>d</sup>Indicates the number of observations included in the FOR analysis (i.e., this is the number of women with PFAS concentration >LOQ plus women with measured PFAS concentration <LOQ). We did not analyze PFBA, PFHpA, or PFTeDA for lack of observations.

<sup>e</sup>Medians were calculated among all 924 women, assigning a value equal to the LOQ/sqrt(2) for non-measured PFAS concentrations.

<sup>f</sup>Medians were calculated among women included in the FOR analysis (i.e., women with PFAS concentration >LOQ plus women with measured PFAS concentration <LOQ).

<sup>g</sup>Adjusted for maternal age at conception and pre-pregnancy BMI. The explanation for why we did not adjust for previous pregnancy in this analysis is found in eFigure 1.

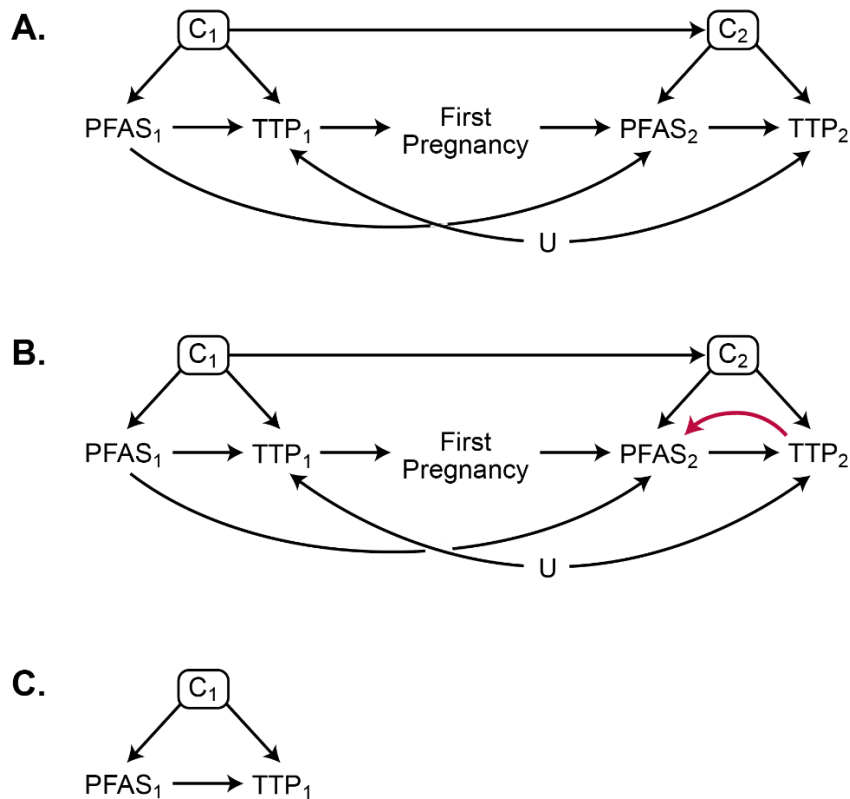

Figure 1. Graphs of the association between perfluoroalkyl substances (PFAS) and time-to-pregnancy (TTP). These graphs were modified from related ones in Bach et al.<sup>4</sup> and Howards et al.<sup>5</sup>

In Panel A, the directed acyclic graph (DAG) shows PFAS exposure before the first pregnancy ( $PFAS_1$ ) causes longer time-to-first-pregnancy ( $TTP_1$ ), and exposure before the second pregnancy ( $PFAS_2$ ) causes longer time-to-second-pregnancy ( $TTP_2$ ). In addition,  $TTP_1$  causes the first pregnancy; this first pregnancy and  $PFAS_1$  are causes of  $PFAS_2$ , a set of measured confounders ( $C_1$  and  $C_2$ ) acts on the  $PFAS \rightarrow TTP$  causal paths, and  $TTP_1$  and  $TTP_2$  have an unmeasured shared cause ( $U$ ). Note that the path  $PFAS_2 \leftarrow PFAS_1 \rightarrow TTP_1 \leftarrow U \rightarrow TTP_2$  is partially blocked because first pregnancy (i.e., parity) is a child of the collider  $TTP_1$ . By adjusting for parity, the path through the collider  $TTP_1$  would be opened and an association between  $PFAS_2$  and  $TTP_2$  induced.

Panel B shows the same figure as in Panel A, but with the addition of the feedback loop pathway, by which  $TTP_2$  increases  $PFAS_2$  (see manuscript for an explanation, second paragraph in the Methods section). Unlike DAG A, which uses an informal x-axis for time (i.e.,  $PFAS_2$  is depicted to the left of  $TTP_2$ ) and in which there is no violation of the DAG assumption of no feedback loops between an outcome and its cause, the figure in Panel B does violate this assumption. In other words, with parous women in the analysis, the  $PFAS_2 \rightarrow TTP_2$  path has no causal interpretation. If data were available on time from delivery of the first pregnancy to the beginning of attempting the second pregnancy, and on breastfeeding during this period, the diagram could be redrawn as a more complicated time-dependent DAG. Measurement error for these two factors, however, might still bias the  $PFAS_2 \rightarrow TTP_2$  relationship.

Panel C shows a DAG with the simpler relation among variables for primiparous women, which complies with the assumptions of causal graphs and in which the potential source of bias from previous pregnancies is no longer a problem.

## References

1. Brantsaeter AL, Whitworth KW, Ydersbond TA, Haug LS, Haugen M, Knutsen HK, Thomsen C, Meltzer HM, Becher G, Sabaredzovic A, Hoppin JA, Eggesbo M, Longnecker MP. Determinants of plasma concentrations of perfluoroalkyl substances in pregnant Norwegian women. *Environ Int* 2013;**54**:74-84.
2. Whitworth KW, Haug LS, Baird DD, Becher G, Hoppin JA, Skjaerven R, Thomsen C, Eggesbo M, Travlos G, Wilson R, Longnecker MP. Perfluorinated compounds and subfecundity in pregnant women. *Epidemiology* 2012;**23**(2):257-63.
3. Ding J, Zhou H, Liu Y, Cai J, Longnecker MP. Estimating effect of environmental contaminants on women's subfecundity for the MoBa study data with an outcome-dependent sampling scheme. *Biostatistics* 2014;**15**(4):636-50.
4. Bach CC, Bech BH, Nohr EA, Olsen J, Matthiesen NB, Bossi R, Ulbjerg N, Bonfeld-Jorgensen EC, Henriksen TB. Serum perfluoroalkyl acids and time to pregnancy in nulliparous women. *Environ Res* 2015;**142**:535-41.
5. Howards PP, Schisterman EF, Poole C, Kaufman JS, Weinberg CR. "Toward a clearer definition of confounding" revisited with directed acyclic graphs. *Am J Epidemiol* 2012;**176**(6):506-11.
